# Supplementary material for: Multidirectional biomimetic deformation of microchannel programmed metal nanowire liquid crystal networks
Source: Royal Society of Chemistry journal article supplement (doi:10.1039/c9tc03625c), 2019-01-01
Supplement: c9tc03625c6.pdf [file c9tc03625c6.pdf]

## Supporting Information

### Multidirectional biomimetic deformation of microchannel programmed metal nanowires liquid crystal networks

Lanshan Zhang, Jingkai Pan, Chenxu Gong, Aimin Zhang\*

**Materials.** 4-nitrobenzoic acid, sodium hydroxide, glucose (analytical grade), potassium carbonate, acetic acid, allyl bromide, N,N-dimethylformamide (DMF) and all analytical reagents were purchased from Aladdin. Unless otherwise stated, all reagents and solvents were used without further purification.

**General characterizations.** The UV absorption spectrum of azobenzene molecule (MAB) was measured using a UV-3600 spectrophotometer (Shimadzu). The  $^1\text{H}$  NMR spectrum of MAB was collected to confirm the molecular structure information by a Bruker-AVANCE III HD 400 nuclear magnetic resonance spectrometer (Bruker).  $\text{CDCl}_3$  was used as reagent.

**Synthesis of MAB.** 4-Nitrobenzoic acid (7.5 g, 0.055 mol), NaOH (25.0 g, 0.625 mol) and deionized  $\text{H}_2\text{O}$  (120 mL) were mixed in a 500 mL round-bottom flask and stirred vigorously at 50 °C for 25 min, which was labeled as solution A. Glucose (50.0 g, 0.228 mol) was dissolved in 75 mL of  $\text{H}_2\text{O}$ , which was named to be solution B. Then, the solution B was added dropwise to the solution A and stirred for 30 min at 55 °C. After cooling to room temperature, the product could be precipitated out once the PH of solution was adjusted to 6 using 36 wt% acetic acid. The precipitation was washed at least three times with distilled water. The crude product was purified by 3 cycles of dissolution-precipitation processes using hot 10 wt% potassium carbonate solution and acetic acid. Finally, the product (AB) was washed with distilled water until the lotion became neutral, and then dried at 65 °C for 24 h. The dried product was dissolved in 200 ml of DMF, and an appropriate amount of 3-bromopropene was added. Then, the mixture was vigorously stirred at 90 °C for 24 h, and filtered after cooling. The desired MAB product was precipitated out by adding 600 mL of brine ice, and then filtered, washed and dried.

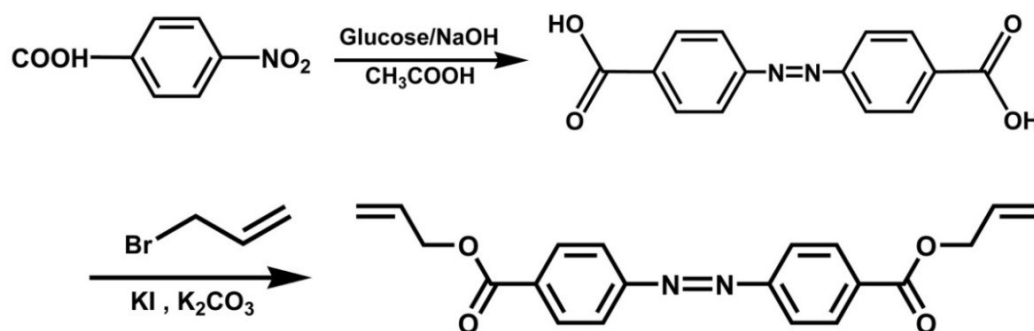

Fig. S1 Schematic diagram of the synthetic route of MAB

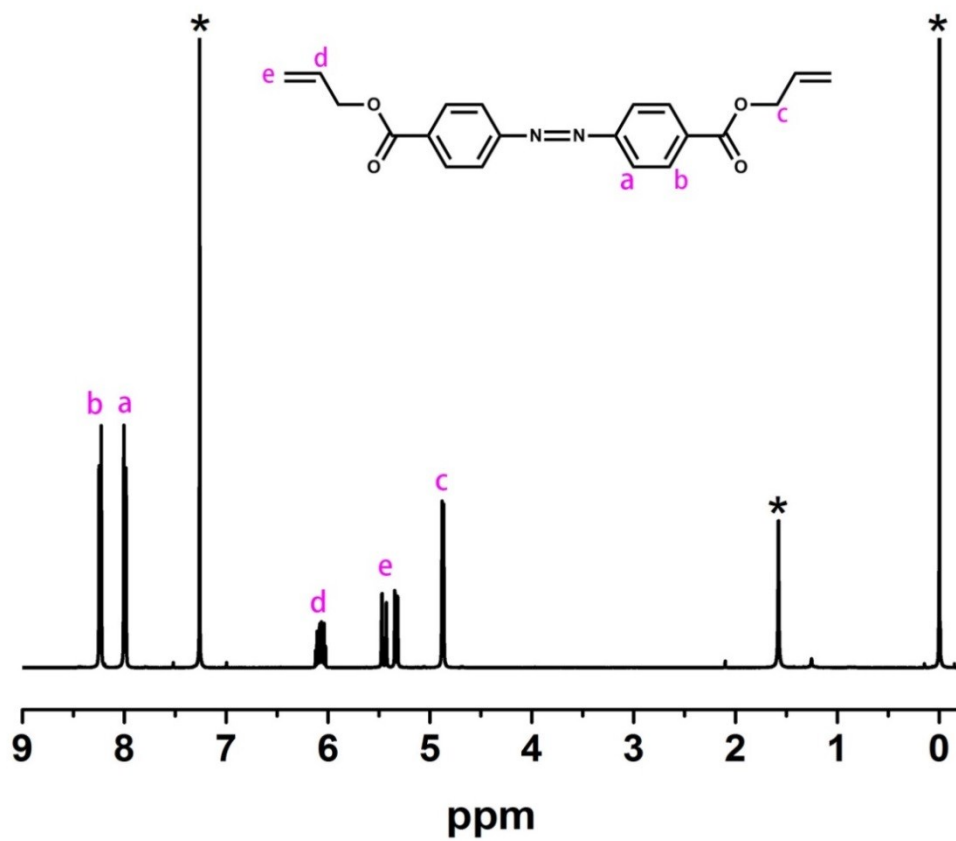

Fig. S2  $^1\text{H}$ NMR spectrum of MAB in  $\text{CDCl}_3$

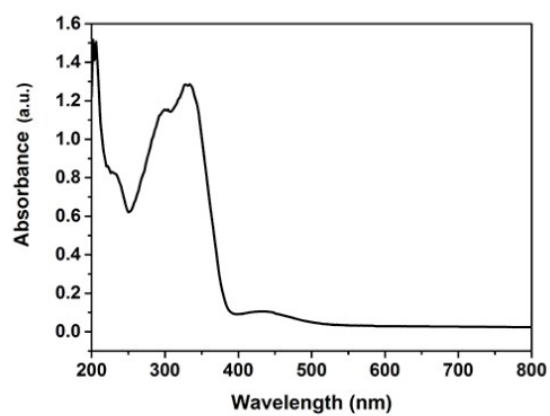

Fig. S3 UV-Vis spectrum of a solution of MAB in acetone.

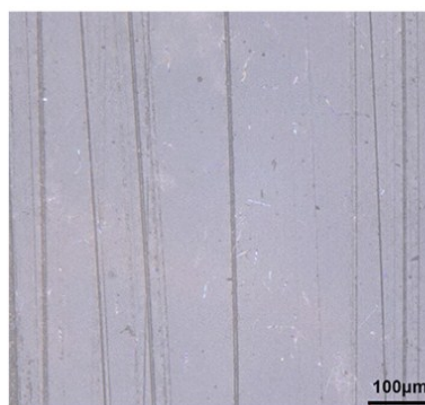

Fig. S4 Distribution of silver nanowires in film

As illustrated in Fig. S5, FTIR spectroscopy, which is rather sensitive to the groups change, can be used to characterize the chemical structure of the synthesized products. From Fig. S5, the wavenumber region of  $3441\text{ cm}^{-1}$  is assigned to the vibration of  $-\text{COOH}$ . After the nucleophilic substitution reaction, the area of this region is significantly rdecreased. Further, the peaks at  $1728\text{ cm}^{-1}$  and  $1269\text{ cm}^{-1}$  can be attributed to the characteristic peaks of the ester group. The above results indicate the feasibility of nucleophilic substitution reaction in which the allyl group successfully replaces the hydrogen in the carboxyl group. The target product (MAB) was successfully synthesized.

According to the physico-chemical property of (4-[(4-carboxyphenyl)diazenyl]benzoic acid (AB) , its melting point is  $360\text{ }^{\circ}\text{C}$ . As can be seen from Fig. S6, the melting point of MAB is  $113\text{ }^{\circ}\text{C}$ , which is easier to melt and mix homogeneously with LC mixture( $66^{\circ}\text{C}$ ).

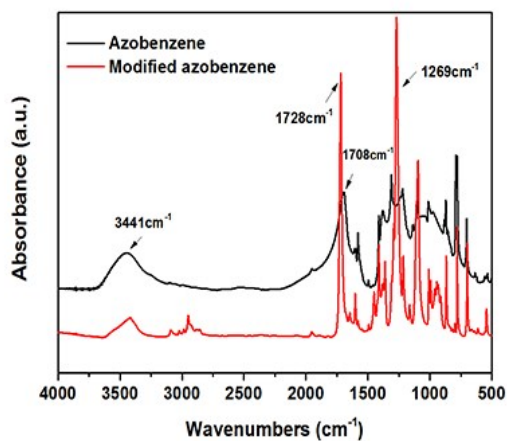

Fig. S5 FT-IR spectra of AB and MAB.

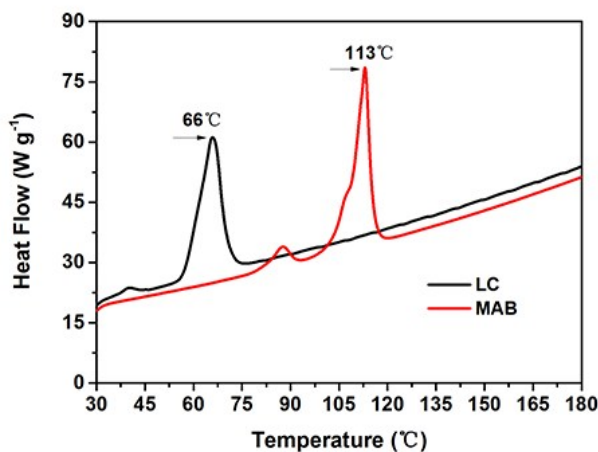

Fig. S6 DSC curves of MAB and LC mixture during a heating-cooling cycle (rate of  $10\text{ }^{\circ}\text{C min}^{-1}$ ).

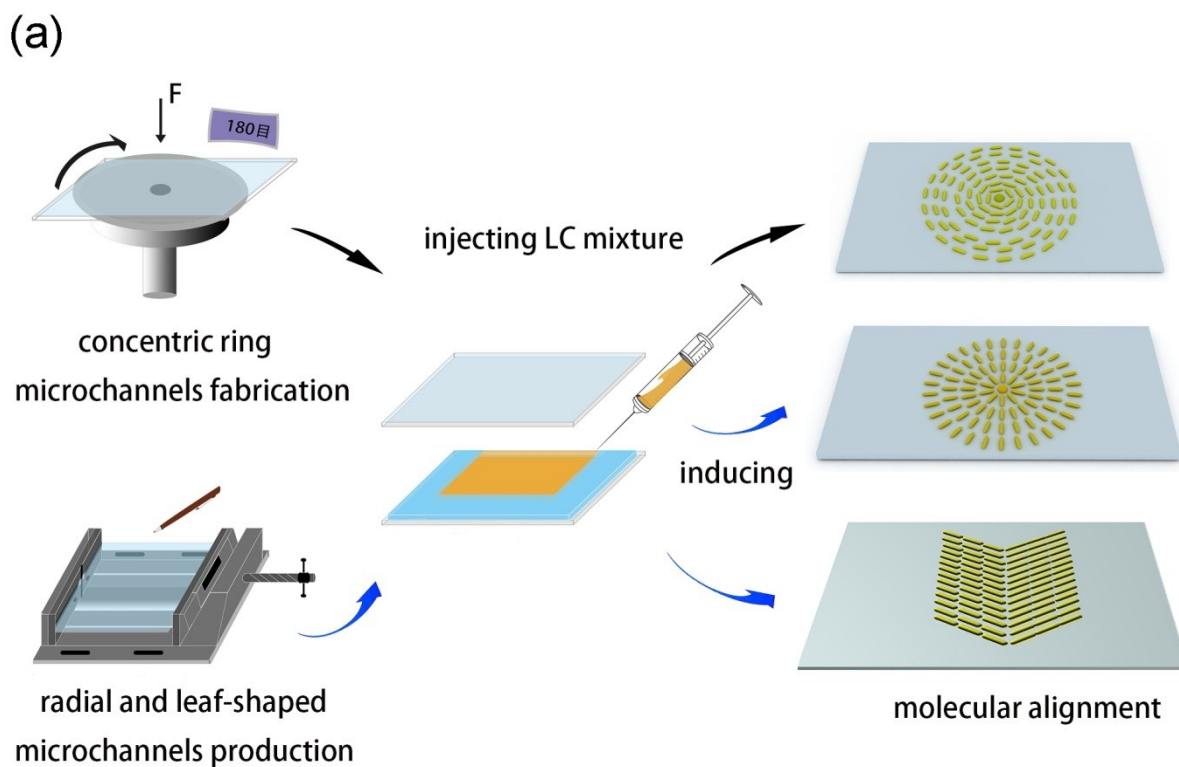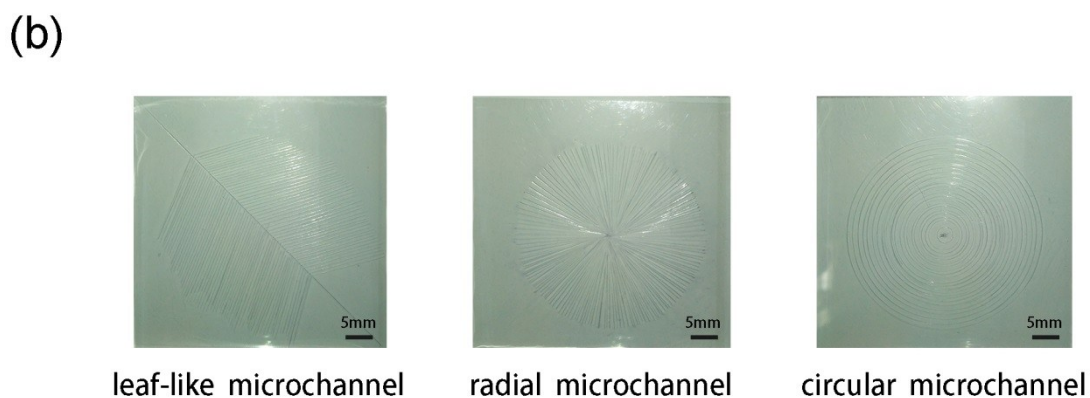

**Fig. S7** Illustration of microchannel fabrication and the liquid crystal molecular alignment.

#### Details of microchannel fabrication

For the concentric ring microchannel fabrication, the glass substrate was placed on a rotating platform, and sandpaper was used to rub the glass plate under the vertical force. In addition, for the fabrication of radial and leaf-like microchannels, the glass substrate was fixed in the jig, and the microchannel structure was drawn by using diamond pen and ruler. Then the spacer strips was encapsulated with the glass substrate, leaving a gate to inject the LC mixture into the cell. As shown in Fig. S7, the molecules are arranged along the microchannels.

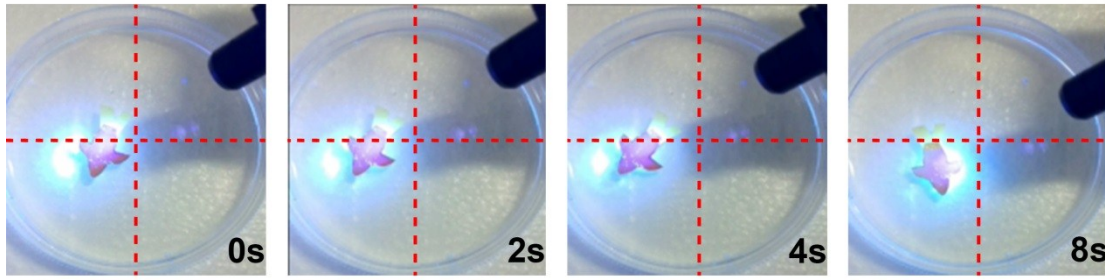

**Fig. S8** The biomimetic fish with AgNW-AZO/LCN tail and dye-doped PDMS body.

**Table S1** Comparisons between the AgNW-AZO/LCN based actuator and previously reported photoresponse actuator.

| Mechanism                                         | Materials      | Light source            | Molecular orientation method | Bending angles | Recovery time | Reference        |
|---------------------------------------------------|----------------|-------------------------|------------------------------|----------------|---------------|------------------|
| Photothermal effect and Photoisomerization effect | ALCE           | 365nm<br>550nm          | Stretch orientation          | N/A            | 30s           | 1                |
|                                                   | AZO crosslink  | 365nm                   | Stretch orientation          | N/A            | 45s           | 2                |
|                                                   | LCN            | 460nm                   |                              |                |               |                  |
|                                                   | AZO doped      | 470nm                   | Photo-alignment agent        | 300°           | 23s           | 3                |
|                                                   | LCE            |                         |                              |                |               |                  |
|                                                   | CLCP           | 365nm<br>530nm          | mechanical rubbing           | 180°           | 14s           | 4                |
|                                                   | AZO crosslink  | 365nm                   | Stretch orientation          | 65°            | N/A           | 5                |
|                                                   | LCN            |                         |                              |                |               |                  |
|                                                   | AZO doped      | 488nm                   | Rubbing alignment Layer      | 90°            | 1s            | 6                |
|                                                   | LCE            |                         |                              |                |               |                  |
|                                                   | AZO doped      | 532nm                   | Rubbing alignment Layer      | 90°            | 0.2s          | 7                |
|                                                   | LCE            |                         |                              |                |               |                  |
| AZO doped                                         | 365nm<br>660nm | Rubbing alignment Layer | 70°                          | 8s             | 8             |                  |
| LCE                                               |                |                         |                              |                |               |                  |
| <b>AgNW doped AZO-LCN</b>                         |                | <b>365nm</b>            | <b>Microchannel Inducing</b> | <b>170°</b>    | <b>10s</b>    | <b>This work</b> |

## Movie Captions.

**Movie S1** The reversible bending process of the AgNW-AZO/LCN strip under 365 nm light ( $80 \text{ mW cm}^{-2}$ ) illumination.

**Movie S2** Simulate the blooming/closing process of the Actuator-1.

**Movie S3** The petals deformation and recovery of the Actuator-2 under UV irradiation.

**Movie S4** The curling process of the smart biomimetic leaf (Actuator-3).

**Movie S5** Light-controlled surfing of robotic swimmer based on AgNW doped LCN.

## References

1. X. Lu, S. Guo, X. Tong, H. Xia and Y. Zhao, *Advanced materials*, 2017, **29**, 1606467.
2. M. Lahikainen, H. Zeng and A. Priimagi, *Nature communications*, 2018, **9**, 4148.
3. H. Zeng, O. M. Wani, P. Wasylczyk, R. Kaczmarek and A. Priimagi, *Advanced materials*, 2017, **29**, 1701814.
4. Y. Liu, B. Xu, S. Sun, J. Wei, L. Wu and Y. Yu, *Advanced materials*, 2017, **29**, 1604792.
5. A. H. Gelebart, M. Mc Bride, A. P. H. J. Schenning, C. N. Bowman and D. J. Broer, *Advanced Functional Materials*, 2016, **26**, 5322-5327.
6. O. M. Wani, H. Zeng and A. Priimagi, *Nature communications*, 2017, **8**, 15546.
7. D. Martella, S. Nocentini, D. Nuzhdin, C. Parmeggiani and D. S. Wiersma, *Advanced materials*, 2017, **29**, 1704047.
8. H. Zeng, P. Wasylczyk, C. Parmeggiani, D. Martella, M. Burrese and D. S. Wiersma, *Advanced materials*, 2015, **27**, 3883-3887.
